# Supplementary material for: Radiocarbon Flux Measurements Provide Insight into Why a Pyroligneous Acid Product Stimulates Plant Growth
Source: MDPI journal article supplement (doi:10.3390/ijms25084207), 2024-04-10
Supplement: s1 [file s1]

**Table S1.** Relative Percent Distribution of Identified Organic Substrates in Coriphol™ Product

| Compound                 | Rel. % | Compound                        | Rel. % | Compound                             | Rel. % | Compound                                        | Rel. % |
|--------------------------|--------|---------------------------------|--------|--------------------------------------|--------|-------------------------------------------------|--------|
| butanoic acid            | 0.07   | ethanediol diacetate            | 0.07   | dimethylcyclopentenone               | 0.65   | aminomethyl pyridine oxide                      | 0.06   |
| cyclopentanone           | 0.12   | dimethylcyclopentenone          | 0.04   | methylfuranone                       | 0.25   | methyloctanone                                  | 0.05   |
| pyruvic acid butyl ester | 1.84   | dihydromethylfuranone           | 0.37   | ethylmethylbutyrate                  | 0.29   | cresol                                          | 1.56   |
| methyl dioxolane         | 0.02   | dimethyl pyridine               | 0.06   | dimethyl pentanone                   | 0.11   | isocytosine                                     | 0.04   |
| cyclopentenone           | 1.92   | methylcyclopentenone            | 2.51   | isopropylphenylpentenol              | 0.06   | methyl heptenone                                | 0.07   |
| maleic acid anhydride    | 0.02   | acetyloxybutanone               | 8.04   | phenol                               | 2.64   | methyl furanone                                 | 0.06   |
| methylpyridine           | 0.32   | pyranone                        | 0.02   | propionyl ethylacetate               | 0.11   | methyl hexenone                                 | 0.07   |
| acetyloxypropanone       | 11.68  | methylhexanol acetate           | 0.74   | butoxybutanol                        | 0.11   | propanoic acid phenyl ester                     | 0.03   |
| dihydropyranone          | 0.08   | propionylethylacetate           | 0.22   | ethyl dimethylpyridine               | 0.01   | cyclohexanediol                                 | 0.15   |
| 3-methylbutanol acetate  | 1.83   | pentanoic acid oxo methylester  | 0.04   | diisopropylidene acetone             | 0.06   | dimethyl norbornanol                            | 0.13   |
| dimethylpyridine         | 0.04   | hydroxymethyl butanone          | 0.22   | 3-ethylcyclopentenone                | 0.38   | phenol                                          | 0.03   |
| methylcyclopentenone     | 0.84   | dimethylcyclopentenone          | 0.23   | dihydrodimethylfuranone              | 0.14   | dimethyl phenol                                 | 0.58   |
| furanylethanone          | 1.40   | furanol acetate                 | 6.84   | acetyloxy pentanone                  | 1.38   | isopropyl hexanone                              | 0.06   |
| hydroxybutanoic acid     | 0.01   | dihydro dimethylfuranone        | 0.38   | methyl pyrolidine dione              | 0.35   | methyl propanoic acid anhydride                 | 0.03   |
| hydroxy methyl butanone  | 0.14   | methylisobutyrate               | 0.25   | dihydro methyl propylpyrazole        | 0.14   | guaiacol                                        | 3.24   |
| propanoic acid anhydride | 0.01   | oxobutanoic acid hexyl ester    | 0.16   | dimethyl hexenone                    | 0.05   | octanolacetate                                  | 0.02   |
| dimethylpyridine         | 0.14   | methyl butanoate                | 0.13   | methyl nitroimidazol                 | 0.14   | acetoxy-methyl-cyclopentenone                   | 6.53   |
| cyclohexenone            | 0.13   | dimethoxycyclopentenone         | 0.01   | dimethyl hydroxybutyric acid lactone | 0.10   | furan-2(methylthio)methyl                       | 0.11   |
| dimethylcyclopentenone   | 0.02   | dimethoxycyclopentenone         | 0.12   | hydroxy pyridine                     | 0.19   | pentanoic acid methyl-methylene isopropyl ester | 0.77   |
| hydroxymethylpentenone   | 0.15   | hydroxy isobutyric acid acetate | 0.09   | butoxyethyl acetate                  | 0.12   | methoxy phenol                                  | 0.09   |
| ethanediol diacetate     | 0.07   | propanediol diacetate           | 0.10   | acetyl dihydofuranone                | 0.02   | acetoxy methylfuraldehyde                       | 0.05   |

| Compound                                    | Rel. % | Compound                     | Rel. % | Compound                            | Rel. % | Compound                           | Rel. % |
|---------------------------------------------|--------|------------------------------|--------|-------------------------------------|--------|------------------------------------|--------|
| dimethyl cyclopentadione acetyl derivatives | 0.19   | methyl benzenediol           | 1.96   | propenyl methoxyphenol              | 0.04   | dimethoxy hydroxy benzaldehyde     | 0.04   |
| ethyl thiophenol acetyl derivatives         | 0.04   | trimethylbutyl pyrazine      | 0.05   | dimethyl methoxy phenol             | 0.07   | dimethoxy benzoic acid             | 0.01   |
| acetyl dihydrofuranone                      | 0.47   | dimethyl ethyl thio benzene  | 0.09   | methoxy acetophenone                | 0.09   | propenyl dihydroxy benzene         | 0.02   |
| ethyl hydroxy cyclopentenone                | 0.15   | dimethoxy phenol             | 5.43   | methoxy dimethylphenol              | 0.10   | methoxy hydroxy benzoic acid       | 0.29   |
| diacetyl                                    | 0.15   | methyl benzenediol           | 3.01   | dimethyl dihydroxy phenol           | 0.04   | dihydroxy propenylbenzene          | 0.04   |
| methoxyphenol                               | 0.12   | methyl benzenediol           | 0.02   | methoxy benzene diol                | 0.02   | hydroxy dimethoxy acetyl benzene   | 0.07   |
| cyclohexene-ol dimethylacetate              | 1.42   | methyl benzenediol           | 0.71   | dimethoxy ethylphenol               | 0.66   | dihydroxy phenyl propanone         | 0.02   |
| ethylthiophenol                             | 0.02   | dimethyl benzenediol         | 0.21   | dihydroxy methyl benzaldehyde       | 0.37   | allyl dihydroxy methoxy benzene    | 0.01   |
| methoxy methyl phenol                       | 0.60   | vanillin                     | 0.02   | dihydroxyacetophenone               | 0.33   | demethoxy isopropoxy benzaldehyde  | 0.03   |
| methyl dihydropyranone                      | 1.11   | propyl benzene diol          | 0.04   | benzoic acid methoxy methyl ester   | 0.02   | dimethoxy hydroxy phenyl acetone   | 0.20   |
| dihydroxybenzene                            | 10.76  | benzene thiol dimethylpropyl | 0.05   | dihydroxyacetophenone               | 0.03   | dimethoxy hydroxy phenyl propanone | 0.01   |
| ethyl thiophenol                            | 0.04   | dimethylbenzene diol         | 0.49   | isopropylbenzene thiol              | 0.05   | trimethoxy dihydrocinnamic acid    | 0.03   |
| methyl methoxy phenol                       | 0.05   | dimethoxy phenol             | 0.08   | octanoic acid ethylcyclohexyl ester | 0.03   | dimethoxy propyl oxy benzaldehyde  | 0.03   |
| thiophene ethyl isopentyl                   | 0.05   | ethylbenzenediol             | 0.97   | dimethoxy phenol                    | 0.46   | methyl thiophenyl propanylacetate  | 0.12   |
| methyl propyl thiophene                     | 0.02   | methyl dimethoxyphenol       | 0.84   | dihydroxy acetophenone              | 0.05   | dimethyl trihydroxy benzene        | 0.03   |
| methoxyphenol                               | 0.16   | methoxybenzenediol           | 2.98   | isopropoxy methoxyphenyl propanone  | 0.34   | dihydroxy di(acetoxymethyl)benzene | 0.09   |
| dimethyl methoxy phenol                     | 0.30   | ethylbenzenediol             | 0.67   | dimethoxypropenyl phenol            | 0.09   |                                    |        |
| dimethoxy dimethyl phenol                   | 0.21   | dimethyl benzenediol         | 0.24   | dimethoxypropenyl phenol            | 0.05   |                                    |        |
